# Supplementary material for: An effective method for the synthesis of yolk–shell magnetic mesoporous carbon-surface molecularly imprinted microspheres
Source: Royal Society of Chemistry journal article supplement (doi:10.1039/c6ta00889e), 2016-01-01
Supplement: c6ta00889e1.pdf [file c6ta00889e1.pdf]

Electronic Supplementary Information

## An Effective Method for the Synthesis of Yolk–Shell Magnetic Mesoporous Carbon–Surface Molecularly Imprinted Microspheres

Rui Yang<sup>a</sup>, Yuxin Liu<sup>b</sup>, Xiangyang Yan<sup>a</sup>, Shaomin Liu<sup>a,\*</sup>, Haisong Zheng<sup>b,\*</sup>

<sup>a</sup>Department of chemistry, University of Science and Technology of China, Hefei, Anhui, 230026, China, Tel&Fax: +86 551 3492147, E-mail: [liusm@ustc.edu.cn](mailto:liusm@ustc.edu.cn).

<sup>b</sup>Technology Centre, Anhui Entry-Exit Inspection and Quarantine Bureau, Hefei 230022, P. R. China

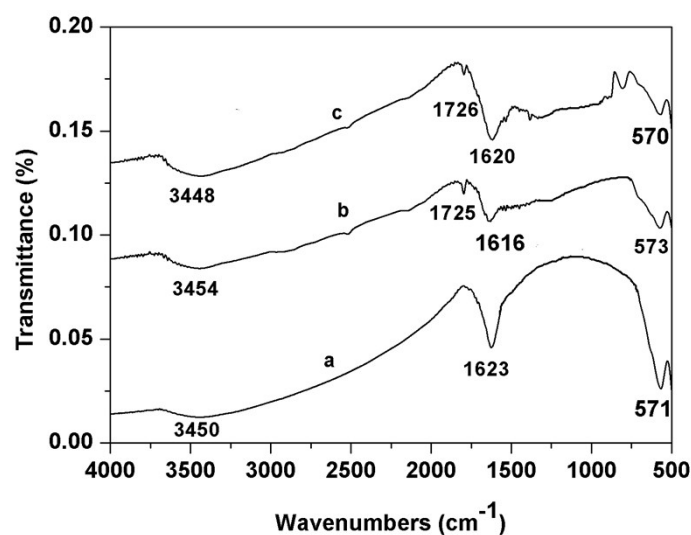

**Fig. S1** FT-IR of Fe<sub>3</sub>O<sub>4</sub>@void@C-COOH under different oxidising conditions

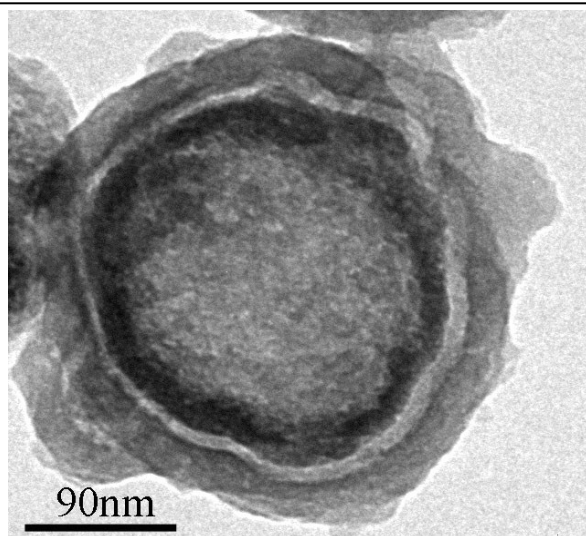

**Fig. S2** TEM of  $\text{Fe}_3\text{O}_4@\text{void}@\text{C}$  oxidising by  $\text{HNO}_3$

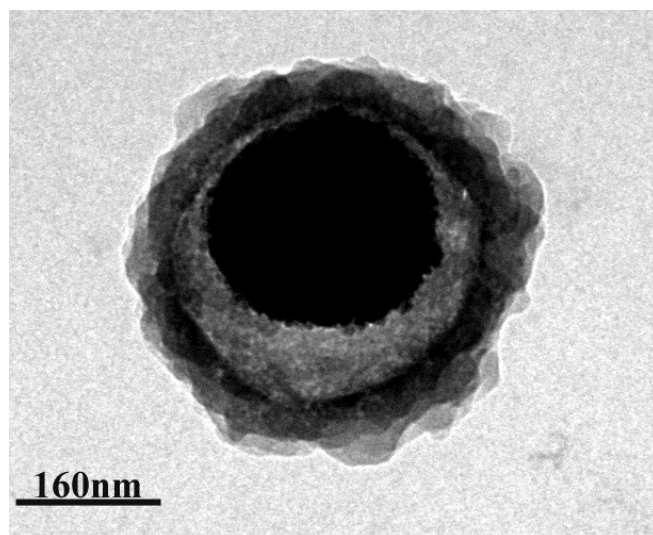

**Fig. S3** TEM of  $\text{Fe}_3\text{O}_4@\text{void}@\text{C}$ -MIPs after six cycles
